# Supplementary material for: Data reduction for SVM training using density-based border identification
Source: PubMed Central journal article supplement (PMC10990207; doi:10.1371/journal.pone.0300641), 2024-04-03
Supplement: pone.0300641.s001.pdf [file pone.0300641.s001.pdf]

**S1 File. Tables for training and testing times of the proposed methods on USPS and Adult9a datasets.**

**Table 1. Training and testing times of the proposed methods (DBI, BRI & BRIX) on the USPS dataset with different reduction ratios.**

| Ratio         | Training time (s) |       |       | Testing time (s) |       |       |
|---------------|-------------------|-------|-------|------------------|-------|-------|
| Whole dataset | 0.337             |       |       | 0.113            |       |       |
|               | DBI               | BRI   | BRIX  | DBI              | BRI   | BRIX  |
| 0.01          | 0.004             | 0.004 | 0.004 | 0.019            | 0.014 | 0.012 |
| 0.02          | 0.005             | 0.005 | 0.006 | 0.027            | 0.023 | 0.017 |
| 0.03          | 0.006             | 0.006 | 0.005 | 0.030            | 0.028 | 0.020 |
| 0.04          | 0.006             | 0.007 | 0.006 | 0.035            | 0.033 | 0.020 |
| 0.05          | 0.009             | 0.008 | 0.007 | 0.053            | 0.036 | 0.024 |
| 0.1           | 0.014             | 0.012 | 0.013 | 0.068            | 0.049 | 0.024 |
| 0.2           | 0.026             | 0.023 | 0.018 | 0.066            | 0.048 | 0.027 |
| 0.3           | 0.038             | 0.040 | 0.027 | 0.065            | 0.053 | 0.028 |
| 0.4           | 0.051             | 0.051 | 0.042 | 0.063            | 0.054 | 0.036 |
| 0.5           | 0.068             | 0.065 | 0.054 | 0.064            | 0.054 | 0.038 |
| 0.6           | 0.081             | 0.078 | 0.069 | 0.062            | 0.055 | 0.042 |
| 0.7           | 0.102             | 0.103 | 0.091 | 0.062            | 0.059 | 0.049 |
| 0.8           | 0.130             | 0.119 | 0.122 | 0.065            | 0.061 | 0.054 |
| 0.9           | 0.144             | 0.132 | 0.145 | 0.064            | 0.065 | 0.060 |

**Table 2. Training and testing times of the proposed SVO & SVOX methods on the USPS dataset with different values of  $k$ .**

| $k$           | Training time (s) |       | Testing time (s) |       |
|---------------|-------------------|-------|------------------|-------|
| Whole dataset | 0.348             |       | 0.115            |       |
|               | SVO               | SVOX  | SVO              | SVOX  |
| 1             | 0.029             | 0.009 | 0.097            | 0.027 |
| 2             | 0.033             | 0.010 | 0.103            | 0.030 |
| 3             | 0.037             | 0.011 | 0.101            | 0.030 |
| 4             | 0.041             | 0.012 | 0.110            | 0.031 |
| 5             | 0.044             | 0.013 | 0.112            | 0.029 |
| 10            | 0.064             | 0.018 | 0.110            | 0.031 |
| 15            | 0.082             | 0.023 | 0.112            | 0.032 |
| 20            | 0.096             | 0.027 | 0.117            | 0.032 |
| 30            | 0.120             | 0.033 | 0.117            | 0.031 |
| 40            | 0.146             | 0.040 | 0.122            | 0.035 |
| 50            | 0.164             | 0.045 | 0.115            | 0.030 |

**Table 3. Training and Testing times of the proposed methods (DBI, BRI & BRIX) on the Adult9a dataset with different reduction ratios.**

| Ratio         | Training time (s) |       |       | Testing time (s) |       |       |
|---------------|-------------------|-------|-------|------------------|-------|-------|
| Whole dataset | 86.861            |       |       | 25.665           |       |       |
|               | DBI               | BRI   | BRIX  | DBI              | BRI   | BRIX  |
| 0.01          | 0.03              | 0.01  | 0.02  | 0.30             | 0.21  | 0.31  |
| 0.02          | 0.02              | 0.06  | 0.02  | 0.47             | 0.46  | 0.47  |
| 0.03          | 0.05              | 0.09  | 0.05  | 0.67             | 0.86  | 0.58  |
| 0.04          | 0.08              | 0.15  | 0.08  | 0.86             | 1.24  | 0.74  |
| 0.05          | 0.11              | 0.24  | 0.10  | 0.99             | 1.73  | 0.91  |
| 0.1           | 0.38              | 0.70  | 0.28  | 2.06             | 4.33  | 1.37  |
| 0.2           | 1.82              | 2.78  | 1.06  | 4.83             | 8.23  | 2.70  |
| 0.3           | 5.74              | 6.31  | 2.66  | 8.62             | 11.87 | 3.95  |
| 0.4           | 11.42             | 12.26 | 5.75  | 12.49            | 14.76 | 5.72  |
| 0.5           | 18.25             | 19.32 | 10.26 | 15.69            | 15.67 | 8.35  |
| 0.6           | 26.87             | 27.24 | 16.00 | 19.06            | 17.77 | 10.47 |
| 0.7           | 35.56             | 35.69 | 25.49 | 20.59            | 20.72 | 14.39 |
| 0.8           | 51.58             | 48.34 | 40.39 | 24.20            | 20.66 | 17.31 |
| 0.9           | 67.50             | 66.32 | 60.72 | 25.54            | 24.04 | 22.21 |

**Table 4. Training and testing times of the proposed SVO & SVOX methods on the Adult9a dataset with different values of  $k$ .**

| $k$           | Training time (s) |       | Testing time (s) |       |
|---------------|-------------------|-------|------------------|-------|
| Whole dataset | 83.503            |       | 26.129           |       |
|               | SVO               | SVOX  | SVO              | SVOX  |
| 1             | 13.809            | 2.302 | 15.954           | 5.294 |
| 2             | 14.635            | 2.514 | 16.456           | 5.425 |
| 3             | 14.865            | 2.486 | 17.058           | 5.396 |
| 4             | 14.875            | 2.464 | 16.444           | 5.249 |
| 5             | 14.958            | 2.626 | 16.438           | 5.363 |
| 10            | 16.387            | 2.980 | 17.695           | 5.439 |
| 15            | 17.083            | 3.133 | 18.318           | 5.609 |
| 20            | 17.844            | 3.176 | 17.657           | 5.720 |
| 30            | 19.280            | 3.725 | 18.744           | 5.785 |
| 40            | 20.286            | 3.848 | 19.488           | 5.869 |
| 50            | 21.197            | 3.989 | 19.194           | 5.984 |
