# Supplementary material for: Data reduction for SVM training using density-based border identification
Source: PubMed Central journal article supplement (PMC10990207; doi:10.1371/journal.pone.0300641), 2024-04-03
Supplement: pone.0300641.s002.pdf [file pone.0300641.s002.pdf]

## S2 File. List of Acronyms used in this paper.

---

| <b>Notation</b> | <b>Description</b>                                          |
|-----------------|-------------------------------------------------------------|
| BPLSH           | border point extraction based on locality-sensitive hashing |
| BRI             | Border-biased Random Instance selection                     |
| BRIX            | Border-biased Random Instance selection with eXclusion      |
| CBCH            | clustering-based convex hull                                |
| DBI             | Density-based Border Identification                         |
| DBSCAN          | Density-Based Spatial Clustering of Applications with Noise |
| FDR             | Fisher Discriminant Ratio                                   |
| FIFDR           | Fast Iteration of FDR                                       |
| KM-SVM          | K-means SVM                                                 |
| LSH             | locality-sensitive hashing                                  |
| PCA             | Principal Components Analysis                               |
| RBF             | Radial Basis Function                                       |
| SE              | Shell Extraction                                            |
| SV              | Support Vector                                              |
| SVM             | Support Vector Machine                                      |
| SVO             | Support Vector Oracle                                       |
| SVOX            | Support Vector Oracle with eXclusion                        |
| t-SNE           | t-Distributed Stochastic Neighbor Embedding                 |
| UMAP            | Uniform Manifold Approximation and Projection               |

---
